# Supplementary material for: Epigenetic and Transcriptional Alterations in Human Adipose Tissue of Polycystic Ovary Syndrome
Source: PubMed Central journal article supplement (PMC4791632; doi:10.1038/srep22883), 2016-03-15
Supplement: srep22883-s1.pdf [file srep22883-s1.pdf]

## **Epigenetic and Transcriptional Alterations in Human Adipose Tissue of Polycystic Ovary Syndrome**

Milana Kokosar<sup>1</sup>, Anna Benrick<sup>1</sup>, Alexander Perfilyev<sup>2</sup>, Romina Fornes<sup>3</sup>, Emma Nilsson<sup>2</sup> Manuel Maliqueo<sup>3,4</sup>, Carl Johan Behre<sup>5</sup>, Antonina Sazonova<sup>6</sup>, Claes Ohlsson<sup>7</sup>, Charlotte Ling<sup>2</sup> & Elisabet Stener-Victorin<sup>4\*</sup>

<sup>1</sup> Department of Physiology, Institute of Neuroscience and Physiology, Sahlgrenska Academy, University of Gothenburg, Gothenburg, Sweden.

<sup>2</sup> Epigenetics and Diabetes, Department of Clinical Sciences, Lund University Diabetes Centre, Lund University, Clinical Research Centre, Malmö, Sweden.

<sup>3</sup> Laboratorio de Endocrinología y Metabolismo, Departamento de Medicina Occidente, Facultad de Medicina, Universidad de Chile, Santiago, Chile.

<sup>4</sup> Department of Physiology and Pharmacology, Karolinska Institutet, Stockholm, Sweden.

<sup>5</sup> The Wallenberg Laboratory and Sahlgrenska Center for Cardiovascular and Metabolic Research, Institute of Medicine, Sahlgrenska Academy, University of Gothenburg, Gothenburg, Sweden.

<sup>6</sup> Department of Obstetrics and Gynecology, Reproductive Medicine, Institute of Clinical Sciences, Sahlgrenska Academy, University of Gothenburg, Gothenburg, Sweden.

<sup>7</sup> Department of Internal Medicine, Centre for Bone and Arthritis Research, Institute of Medicine, Sahlgrenska Academy, University of Gothenburg, Gothenburg, Sweden.

**Study participants.** Women with PCOS and controls were recruited by advertising in local newspapers and in frequently visited places in the community. All women were  $\geq 18$  and  $\leq 38$  years of age. The eligibility criteria for women with PCOS were at least two of the following three signs; polycystic ovarian morphology (PCO), clinical signs of hyperandrogenism and oligo/amenorrhea. The criteria for ultrasound-verified PCO were  $\geq 12$  follicles 2–9 mm and/or ovarian volume  $\geq 10$  ml in one or both ovaries. A self-reported Ferriman-Gallwey (FG) score  $\geq 8$  was defined as hirsutism and acne was defined by a positive response to the question Do you have acne? Oligomenorrhea was defined as an intermenstrual interval  $>45$  days and  $<8$  menstrual bleedings in the past year. Amenorrhea was defined as  $<3$  menstruations per year.

Exclusion criteria for controls were evidence of PCO morphology, excessive acne or hirsutism, or menstrual irregularities (cycles  $>35$  days). Exclusion criteria for all women were any signs of other endocrine disorders such as hyperprolactinemia (s-prolactin  $<27\mu\text{g/l}$ ), nonclassic congenital adrenal hyperplasia ( $17\beta$  hydroprogesterone  $<3\text{nmol/l}$ ), and androgen-secreting tumors or autoimmune disorder, cancer, type I or type II diabetes or cardiovascular disease. Moreover, women had not received any pharmacological treatment within 12 weeks before inclusion, had not been pregnant, and had not been breastfeeding for 6 months before inclusion.

## Supplementary Table Legends

**Table S1:** Genes differently expressed in adipose tissue from women with PCOS (n=64) and controls (n=30) ( $Q < 0.05$ ) sorted in alphabetic order (cohort 1).

**Table S2.** Significant gene sets contributing to Z-score for expression pathways that are up-regulated in adipose tissue from women with PCOS versus controls (cohort 1).

**Table S3.** Significant gene sets contributing to Z-score for expression pathways that are down-regulated in adipose tissue from women with PCOS versus controls (cohort 1).

**Table S4.** Selected genes of relevance for PCOS found to be differentially expressed in cohort 1 were biological validated in cohort 2.

**Table S5:** Differential methylation in adipose tissue from women with PCOS and controls  $P < 0.05$ . (XLS)

**Table S6:** Differential methylation of CpG-sites in adipose tissue from women with PCOS and controls applying a  $Q < 0.15$ . (XLS)

**Table S7:** Significant gene sets with differential methylated genes in adipose tissue from women with PCOS versus controls. IPA analyses with  $P < 0.05$ . (XLS)

**Table S8.** Significant gene sets contributing to Z-score for differential methylated methylation pathways that are up-regulated in adipose tissue from women with PCOS versus controls (cohort 1).

**Table S9.** Significant gene sets contributing to Z-score for differential methylated methylation pathways that are down-regulated in adipose tissue from women with PCOS versus controls (cohort 1).

**Table S10:** Differential methylation in adipose tissue from women with PCOS and controls based on the cross reactive probes  $P < 0.05$ . (XLS)

**Table S11:** Differential DNA methylation in adipose tissue ( $Q < 0.15$  and the range of difference in  $\beta$ -value is 0.3 - 3%) concurrent with an inverse change in mRNA expression ( $P < 0.05$ ) of the nearest gene between PCOS women and controls (cohort 1).

**Table S12:** Differential methylation of DNA methyltransferases (*DNMTs*), a family of enzymes catalyzing the transfer of a methyl group to DNA, in adipose tissue from women with PCOS and controls.

**Table S13.** Spearman correlations with correction for multiple testing ( $Q < 0.05$ ) between methylation and expression for significantly differentially expressed genes and CPG sites within the cis distance 500 kb upstream and 100 kb downstream of the gene.
